# Supplementary material for: Genome-wide SNP Genotyping Resolves Signatures of Selection and Tetrasomic Recombination in Peanut
Source: PubMed Central journal article supplement (PMC5315502; doi:10.1016/j.molp.2016.11.015), 2017-02-13
Supplement: mmc1.pdf [file mmc1.pdf]

## 1 **Supplemental Information**

### 2 **Supplementary Results**

#### 3 **Tetraploid markers**

4 The array was evaluated using 384 tetraploid and diploid genotypes, including the genotypes  
5 used to design the array, the USDA mini core collection, 96 individuals from each of two RIL  
6 populations, a selection of US released cultivars spanning the history of US peanut breeding,  
7 ten diploid species, four induced allotetraploid individuals, and an *A. monticola* accession (Table  
8 S9). Evaluating the tetraploid genotypes, a total of 15,287 markers produced scorable,  
9 polymorphic markers. The markers fall into the following categories (Figure S7): 4,647  
10 PolyHighResolution (24.18%; genotypes forming three clusters within expected priors) (Figure  
11 S7A); 9,818 NoMinorHom (65.25%; no representative genotype with homozygous minor allele)  
12 (Figure S7B); 1,330 Other (8.84%; falling below two or more thresholds) (Figure S7C); 151 OTV  
13 (1%) (Figure S7D; off target variants); and 109 CallRateBelowThreshold (0.87%; genotype call  
14 rate is below threshold) (Figure S7E).

15 Called SNPs were filtered from the WGS sequence data using the pipeline SWEEP (Clevenger  
16 and Ozias-Akins, 2015). The array provided an opportunity for large scale validation of the  
17 pipeline using WGS *A. hypogaea* data. Out of the 42,658 putative markers identified from the  
18 WGS data, 14,223 (33%) were scorable, polymorphic markers. The other polymorphic markers  
19 (1,064) were identified from diploid species.

#### 20 **Interspecific markers**

21 Cultivated peanut has undergone a genetic bottleneck and interspecific populations are  
22 important tools to introduce beneficial alleles from diploid wild relatives. Interspecific  
23 populations have been made using two methods, known as the hexaploid and tetraploid routes  
24 (Stalker *et al.*, 1979; Simpson 1993). The hexaploid route first generates a triploid hybrid from a  
25 cross between the tetraploid *A. hypogaea* and a diploid species, the resulting hybrid is then  
26 colchicine treated to create a hexaploid plant with low fertility that is then selfed through  
27 multiple generations and by spontaneous loss reaches a tetraploid state. The tetraploid route

28 begins by hybridization of A- and B-genome species, and then making the hybrid compatible  
29 with tetraploid *A. hypogaea* through chromosome doubling to recover a synthetic  
30 allotetraploid. Markers that distinguish diploid species are extremely important for mapping  
31 and identifying beneficial alleles from these populations. With this in mind, 13,732 putative  
32 SNP markers polymorphic between six diploid species were included. Ten diploid species were  
33 analyzed on the array including *A. duranensis* V14167 (A), *A. duranensis* K7988, *A. stenosperma*  
34 V10309 (A), *A. cardenasii* GKP10017 (A), *A. villosa* Benth. V12812 (A), *A. correntina* (Burkart)  
35 Krapov. & W.C. Greg. V12812 (A), *A. ipaensis* K30076 (B), *A. magna* K30097 (B), *A. gregoryii*  
36 V6389 (B), and *A. batizocoi* K9484 (K but B-compatible; Leal-Bertioli *et al.*, 2015b). Additionally,  
37 four induced allotetraploid interspecific hybrids were analyzed on the array, including an *A.*  
38 *batizocoi* x *A. stenosperma*, an *A. gregoryii* x *A. stenosperma*, a first generation *A. duranensis* x  
39 *A. ipaensis* induced allotetraploid, and an *A. duranensis* x *A. ipaensis* induced allotetraploid  
40 after nine self-pollinations.

41 Analysis of these diploids and interspecific hybrids resulted in 53,135 (93.7%) polymorphic  
42 markers; 22,221 PolyHighResolution (38.2%), 3,669 NoMinorHom (6.3%), 12,823 Other (22%),  
43 9,760 OTV (16.8%), and 4,662 CallRateBelowThreshold (8%). Polymorphism within A- or B-  
44 genome species (Figure S8) shows that the array will be useful for genotyping interspecific  
45 populations. Polymorphism between *A. duranensis* and the other A-genome species assayed  
46 ranges from 8,149 to 11,044 polymorphic markers, and between *A. ipaensis* and the B genome-  
47 compatible species, from 6,553 to 19,400 polymorphic markers were detected. Polymorphism  
48 between *A. duranensis* V14167 and *A. duranensis* K7988 includes an additional 3,600  
49 intraspecific polymorphic markers.

50 Three induced allotetraploids derived from diploid hybrids were genotyped on the array to  
51 test the efficacy for genotyping interspecific populations (Figure 5B). Polymorphic markers  
52 between these hybrids and three elite cultivars (Florunner, Tifguard, and Georgia-06G) that  
53 could potentially be used as *A. hypogaea* backcross recurrent parents averaged 29,748  
54 polymorphic markers between the cultivars and the *A. batizocoi* x *A. stenosperma* hybrid, 9,924  
55 polymorphic markers for the *A. ipaensis* x *A. duranensis* hybrid, and 25,238 polymorphic  
56 markers for the *A. gregoryii* x *A. stenosperma* hybrid.

## 57 **Supplementary Experimental Procedures**

### 58 **Filtering, Selection, and Formatting of SNPs for the array**

59 SWEEP-filtered SNPs were filtered to be within 10 kb of *A. duranensis* and *A. ipaensis*  
60 annotated genes (Bertioli *et al.*, 2016). Sequences for each SNP were extracted using custom  
61 scripts in the format prescribed by Affymetrix: (1) 35 bp surrounding each SNP with (2) the two  
62 polymorphic bases ordered alphabetically. Selected SNPs were prioritized if enough Illumina  
63 read data existed to assemble the cultivated sequence for each SNP. Extracted sequences were  
64 then filtered for single copy loci by BLAST against the *A. duranensis* and *A. ipaensis*  
65 pseudomolecules and only selecting those that had a unique hit of  $\geq 94\%$  identity or across at  
66 least 60 aligned bases within each sub genome separately. This stringent filtering resulted in  
67 113,787 SNPs sent to Affymetrix for selection.

### 68 **Identification of diploid SNPs**

69 RNA sequencing data from *A. stenosperma* Krapov. & W.C. Greg. and *A. cardenasii* Krapov. &  
70 W.C. Greg. were mapped to the *A. duranensis* pseudomolecules (Bertioli *et al.*, 2016;  
71 peanutbase.org). RNA sequencing data from *A. batizocoi* and genomic sequencing data from *A.*  
72 *magna* were mapped onto the *A. ipaensis* assembled pseudomolecules (Bertioli *et al.*, 2016;  
73 peanutbase.org). Mapping was performed by using BWA mem v. 0.7.10 with default  
74 parameters (Li and Durbin, 2009). Additionally, three accessions of *A. duranensis* (PI475845,  
75 ICG8123, and ICG8238; Pandey *et al.*, 2017) were used to call SNPs within species. SNPs were  
76 called using Samtools v0.1.9 and filtered as follows: (1) At least 4 reads with the alternative  
77 base and no reference bases in the genotype showing the SNP (2) no SNPs within 35 bp of each  
78 other and (3) within 10kb of annotated gene models. SNPs randomly selected (5,000) from  
79 each diploid species representing 500 SNPs from each chromosome for each species were  
80 chosen. These 25,000 SNPs were added to the 113,787 tetraploid SNPs provided to Affymetrix  
81 for selection. Table S2 and S3 shows read statistics for each species.

### 82 **Simulation of neutral model tracking fixation across breeding cycles**

83 Because breeding and selection uses small sample sizes, alleles can be rapidly fixed due to  
84 genetic drift and not as a result of intensive selection. A simulation was carried out assuming  
85 neutral selection using the pedigree as a guide. At each cycle, the breeding process was  
86 recreated using the parental genotypes and 50 released progeny were generated. For each  
87 cross, the distribution of observed distances between recombination (see Figure S1) was  
88 sampled and each parent's alleles were transferred to the progeny based on random  
89 independent assortment. Each cycle was recreated based on the actual pedigree. Briefly, the  
90 first cycle was generated from 25 released progeny derived from the cross of Basse x Spanish  
91 18-38 and 25 progeny generated from the cross of Dixie Giant x Small White Spanish. For cycle  
92 2, 50 released progeny were generated from randomly mated pairs of cycle 1 progeny. Cycle 3  
93 progeny were generated from randomly mated pairs of cycle 2 progeny and 25% of the time  
94 one parent was Jenkins Jumbo, as at cycle 3 Jenkins Jumbo was included as a parent. Cycle 4  
95 introduced as parents Virginia Bunch 67 and PI203396. PI295785 was introduced as a parent in  
96 cycle 5 and PI203396 was used as a parent for this cycle as well. For cycles 6, 7, and 8, progeny  
97 were generated from randomly mated pairs of the previous cycle. The percent of fixed alleles  
98 across all markers for all 50 generated progeny was calculated for each cycle. This simulation  
99 was carried out 10,000 times and a second time for 5,000 times. The average, standard  
100 deviation, and 99% percentile of the distribution was calculated. The simulation python script is  
101 available in Supplementary file S1 as simulate\_allele\_fixation.py

## 102 **Neutral selection/drift simulation to derive a null distribution**

103 To account for the fixation of alleles in the absence of selection due to genetic drift and small  
104 effective population sizes, simulations were performed under a neutral model by recreating  
105 pedigree selection of an inbred crop with different  $F_2$  starting population sizes and different  
106 selection intensities. Population sizes of 200, 300, and 400 individual  $F_2$  families based on the  
107 number of seeds available from a single  $F_1$  plant from a specific cross. Selection intensities of  
108 0.1, 0.2, and 0.3 were used for all population sizes. The simulations were performed for each  
109 marker, genome-wide, to account for marker-specific allele frequencies within the germplasm  
110 sampled. Fifty genotypes were randomly selected for mating. Of those fifty pairs, if a pair is  
111 polymorphic for the marker of interest, pedigree selection is carried out under neutral selection

112 and the selected allele is noted. Segregation distortion is not taken into account and  
 113 segregation ratios used are those expected in a self-pollinated crop. Random selection at each  
 114 generation is carried out based on the selection intensity until a homozygous allele is randomly  
 115 selected. The random crosses sampled from the actual data give for each simulation a different  
 116 number of tests for possible selection given the real allele frequencies present. The simulation  
 117 was carried out for each marker 100 times for a total of 553,700 simulations per starting  
 118 population size and selection intensity. Nine combinations of population size and selection  
 119 intensity were carried out for a total of 4,983,300 simulations. For each number of tests up to  
 120 45, the 99th percentile was taken as a threshold for significance of directed selection. The  
 121 average across all combinations was taken as a threshold for significance. These results are  
 122 shown in Table S5. There is not sufficient power to detect selection under this model until nine  
 123 tests have been performed. From nine to twenty tests the threshold is selection in more than  
 124 80% of polymorphic crosses. The simulations provide a very stringent threshold to test for  
 125 selection. The simulation python script is available in Supplementary file S1 as  
 126 simulate\_neutral\_selection.py

### 127 **Calculation of Pairwise Haplotype Sharing (PHS)**

128 Pairwise Haplotype Sharing (PHS) for each marker in the two populations of cultivars  
 129 released in cycles 4, 5, and 6 and cultivars released in cycles 7, and 8 was compared against the  
 130 PHS among ancestor/founder lines. PHS was calculated as in (Toomajian *et al.*, 2006) as

$$131 \quad PHS_{x_A} = \frac{\sum_{i=1}^{p-1} \sum_{j=i+1}^p Z_{ijx}}{\binom{p}{2}} - \frac{\sum_{i=1}^{n-1} \sum_{j=i+1}^n Z_{ijx}}{\binom{n}{2}} \quad \text{and} \quad Z_{ijx} = \frac{d_{ijx} - \bar{d}_{ij}}{\sigma_{ij}} \quad \text{with a slight}$$

132 adjustment. This statistic has low power for haplotypes that have been fixed in a given  
 133 population, and since the number of released peanut cultivars is low, we adjusted the PHS by  
 134 the ancestor population instead of within populations. This way the extent of increased  
 135 haplotype sharing in each population was compared to the extent of haplotype sharing present  
 136 within the narrow starting genetic base.  $d_{ijx}$  is the physical distance according to the diploid

137 pseudomolecules over which individuals  $i$  and  $j$  are identical around position  $x$ ,  $\bar{d}_{ij}$  is the mean of  
138 the distance the individuals are identical genome-wide,  $\sigma_{ij}$  is the standard deviation of the  
139 genome wide distribution, and individuals  $i$  and  $j$  share the same allele at position  $x$ . Then,  $p_x$  is  
140 the number of individuals that share the same allele at position  $x$  and  $n$  is the number of  
141 ancestor lines. PHS was calculated for each allele at every marker and then the largest value  
142 was taken. Values greater than the 99<sup>th</sup> percentile of the genome wide distribution of PHS  
143 within each population were determined to be significant. For cycles 4, 5, and 6 this value was  
144 8.11 and for cycles 7 and 8 it was 9.68. The python script to calculate PHS is included in  
145 Supplementary file S1 as calculate\_pairwise\_haplotype\_share.py.

#### 146 **GO enrichment with selected loci**

147 The sum of each GO term present in the *A. duranensis* and *A. ipaensis* genome sequences  
148 (peanutbase.org) and within each selected locus was counted. A hypergeometric test for  
149 enrichment testing the distribution of GO terms within the locus compared to the genome-wide  
150 distribution was then used using the R function phyper() and each p-value was adjusted for  
151 multiple testing using a Benjamini-Hochberg correction. Adjusted p-values were further  
152 filtered to be less than 0.001 to control for false positives due to smaller sample size. Loci with  
153 no GO terms with more than 3 genes represented were not considered further due to  
154 uncertainty.

#### 155 **Frequency of shared haplotypes**

156 The mini core population was used as an estimate of haplotype frequency in *Arachis*  
157 *hypogaea*. All possible 20 marker haplotypes at 5 marker intervals were identified in the 111  
158 mini core genotypes and were ranked for their frequency. The top eight haplotypes were then  
159 assessed for their frequency in the ancestor/founder genotypes and the two populations  
160 comprising of cultivars released in cycles 4,5, and 6 and cultivars released in cycles 7, and 8 with  
161 a unique color based on their mini core frequency. Because PI203396 had such a large effect  
162 on peanut breeding and production, contributing TSWV resistance/tolerance to the cultivated  
163 germplasm, it's haplotype was given a color as well. In addition, all other haplotypes with  
164 frequencies less than the top eight were given a color. These haplotype frequencies were

165 graphed for each population with the population-specific haplotype frequency on the y-axis and  
166 the marker position in five marker intervals on the x-axis. The number of unique haplotypes  
167 per marker position and the frequency of unique haplotypes relative to population number was  
168 derived from the same analysis. The associated python script is available in Supplementary file  
169 S1 as haplotype\_frequency.py.

## 170 **Haplotype diversity analysis**

171 The haplotype diversity was calculated as pairwise diversity,  $\pi$ , in 20 marker haplotypes  
172 moved in five marker intervals across each chromosome within each population. The  
173 populations were the 11 mini core genotypes representing an estimate of the available genetic  
174 diversity within *Arachis hypogaea*, the ancestor/founding genotypes, the cultivars released in  
175 cycles 4,5, and 6, and the cultivars released in cycles 7, and 8. The cultivars released in cycles  
176 1,2, and 3 were not assessed because these cultivars represented germplasm from only two  
177 crosses. Additional ancestor/founder alleles were introduced starting in cycle 4. In addition  
178 cycles 4,5, and 6 represent cultivars released with Florunner as a common parent among them  
179 and cycle 7, and 8 represent cultivars further removed from Florunner and cultivars that  
180 represent the move to high oleic acid content. Diversity was represented as the number of  
181 pairwise differences per marker across each haplotype window. For each population,  $\pi$  was  
182 compared to the estimated possible diversity as  $\log_2(\pi_p / \pi_m)$  where  $\pi_p$  represents the population of  
183 interest and  $\pi_m$  represents the mini core collection. Therefore, loss of diversity results in a  
184 negative value.

185

186

187

188

189

190

191

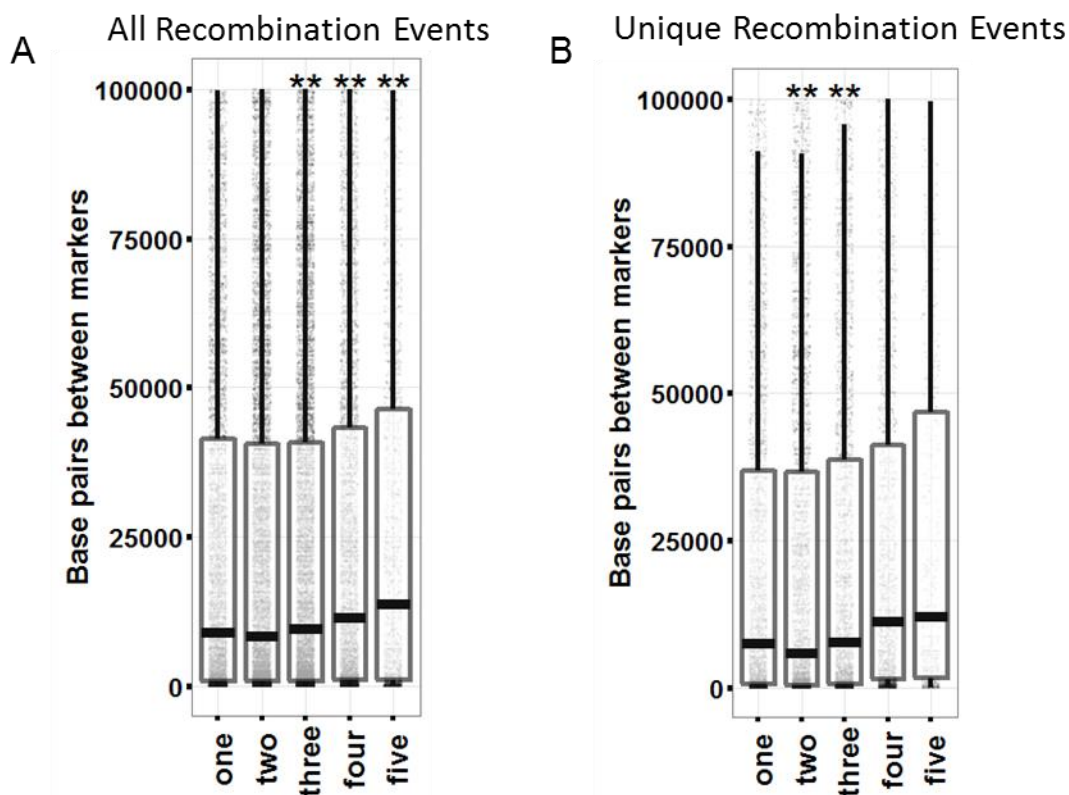

193

194 **Figure S1:** Distance between markers that show a phase change (recombination) after each  
 195 number of crosses, inbreeding, and cultivar selection, related to Figure 7A. A) all phase changes.  
 196 B) phase changes specific to each cross number. Asterisks indicate significant difference in  
 197 distribution between the cross number and the next cross by Wilcox Signed-Rank Test. There is  
 198 a decrease in gain in breaking up large linkage blocks after three crosses as distance between  
 199 markers showing a phase change increases even for unique events.

200  
 201  
 202  
 203  
 204



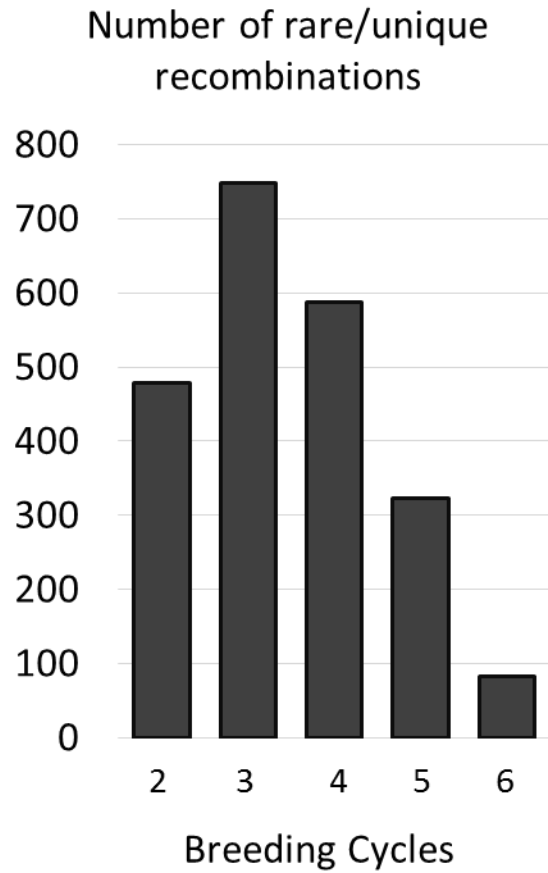

205

206 **Figure S2:** Unique/rare recombinations per cycle, related to Figure 7A. Average number of  
207 recombination events specific to a breeding cycle out of ten parent-progeny breeding paths  
208 where phase changes between markers could be determined.

209

210

211

212

213

214

215

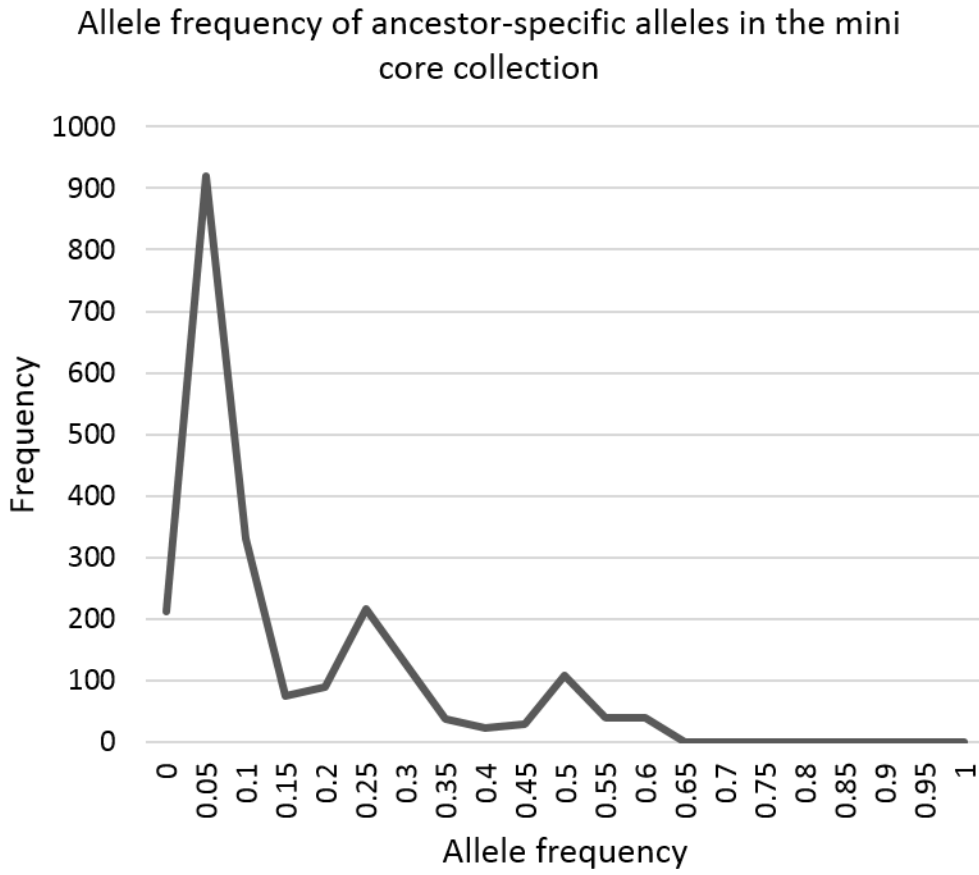

216

217 **Figure S3:** Frequency of ancestor-specific alleles in the mini core collection.

218

219

220

221

222

223

224

225

226

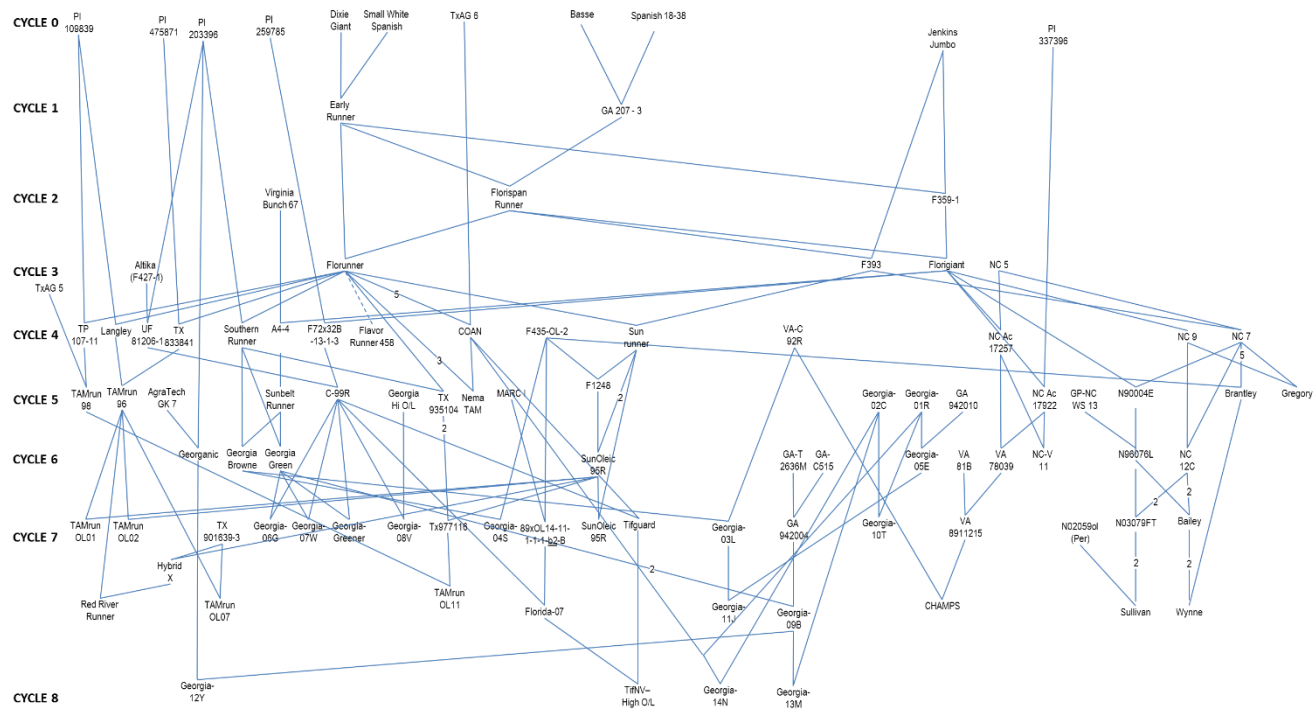

227

228 **Figure S4:** Pedigree of US runner cultivars. Each cultivar is assigned to a cycle based on Isleib *et*  
 229 *al.*, 2000, where a cycle is the number of crosses away from the original ancestors. Pedigree  
 230 also available on [peanutbase.org/pedigree2000](http://peanutbase.org/pedigree2000).

231

232

233

234

235

236

237

238

239

240

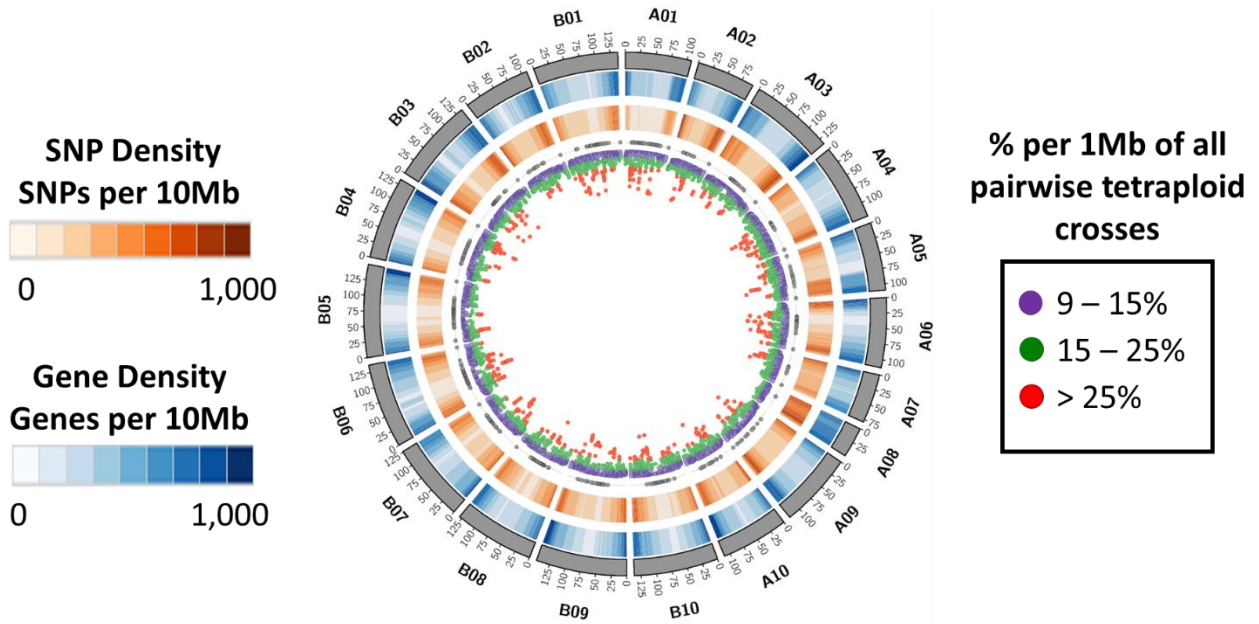

241

242 **Figure S6:** Final array design SNP density and predicted polymorphism. Circos plot showing A.  
 243 *hypogaea* genome represented by *A. duranensis* and *A. ipaensis* pseudomolecules. Outer ring  
 244 is gene density of annotated predicted genes. Second ring is SNP density of the 58,233 SNPs in  
 245 the final design of the Axiom\_Arachis array. Scatter plot shows predicted polymorphism among  
 246 the 21 4x genotypes used to design the array. Percentage polymorphic is all pairwise crosses.  
 247 Scatterplot is sliding window of 1Mb windows sliding 500kb. Gene density and SNP density are  
 248 sliding windows of 10 MB sliding 5Mb.

249

250

251

252

253

254

255

256

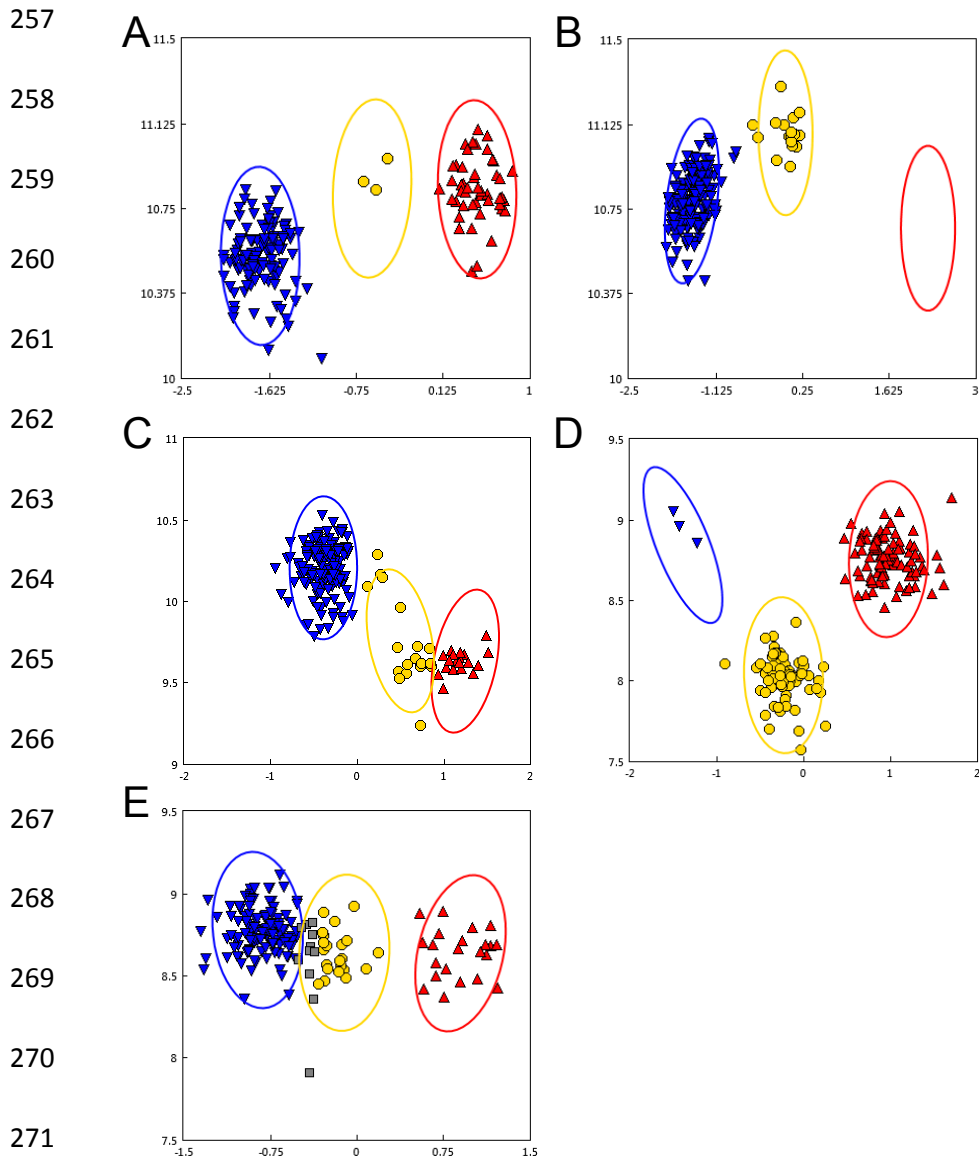

272 **Figure S7:** Examples of 5 different categories of markers segregating in tetraploid germplasm. (A)  
 273 PolyHighResolution; genotypes forming three clusters within expected priors (B) NoMinorHom; no  
 274 representative genotype with homozygous minor allele (C) Other; falling below two or more thresholds  
 275 (D) OTV; Off target variant (E) CallRateBelowThreshold; genotype call rate is below threshold  
 276

277

278

279

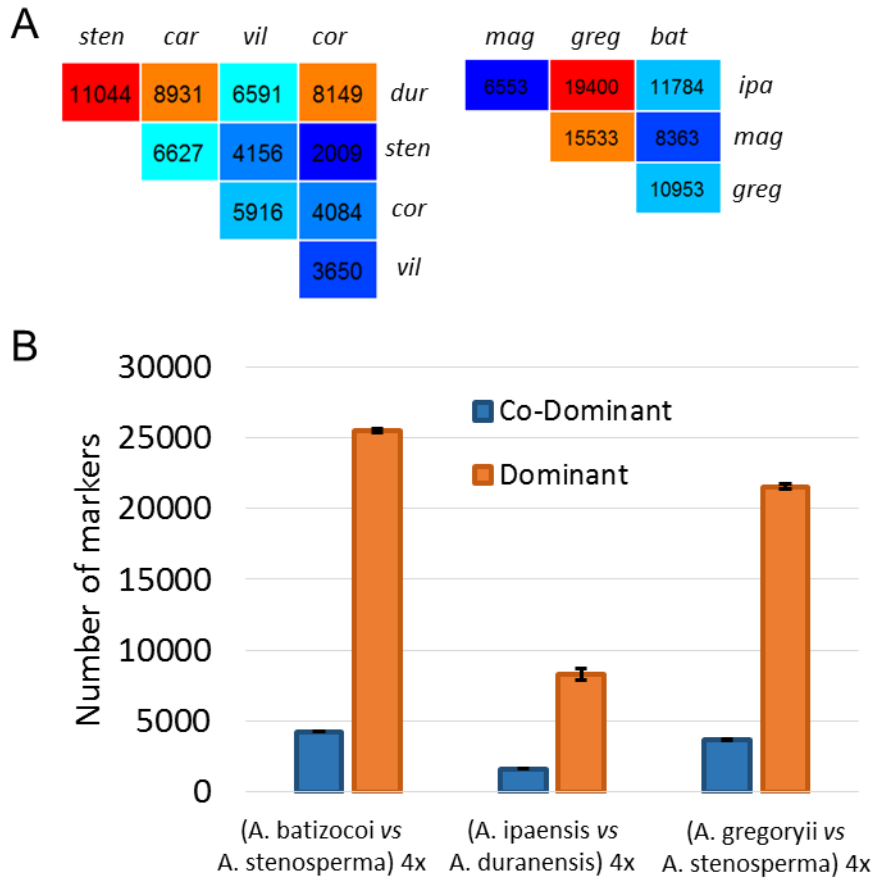

280

281 **Figure S8:** Polymorphism within wild diploid *Arachis* species and between interspecific hybrids and elite  
 282 cultivated genotypes. A) polymorphic markers between A genome (left) and B genome (right)  
 283 compatible species; B) average number of polymorphic markers between three interspecific  
 284 allotetraploid hybrids and elite parents Florunner, Tifguard, and Georgia-06G. *Sten* is *A. stenosperma*;  
 285 *car* is *A. cardenasii*; *vil* is *A. villosa*; *cor* is *A. correntina*; *mag* is *A. magna*; *greg* is *A. gregoryii*; *bat* is *A.*  
 286 *batizocoi*; *dur* is *A. duranensis*; *ipa* is *A. ipaensis*

287

288

289

290

291

292

293

294

295

296 **Supplementary References**

297 Li, H., Durbin, R. (2009). Fast and accurate short read alignment with Burrows-Wheeler Transform.  
298 *Bioinformatics* 25:1754-1760.

299  
300 Pandey, M., Agarwal, G, Kale ,SM, Clevenger, J, Nayak, SN, Sriswathi, M, Chitikineni, A, Chavarro, C,  
301 Chen, X, Upadhyaya, HD, Vishwakarma, MK, Leal-Bertioli, S, Liang, X, Bertioli, DJ, Guo, B,  
302 Jackson, SA, Ozias-Akins, P, Varshney, RK. (2017). Development and Evaluation of a High Density  
303 Genotyping 'Axiom\_Arachis' Array with 58 K SNPs for Accelerating Genetics and Breeding in  
304 Groundnut. *Sci Rep* 7: doi: 10.1038/srep40577.

305
